# Supplementary figures and images for: Specific substrate recognition and thioester intermediate determinations in ubiquitin and SUMO conjugation cascades revealed by a high-sensitive FRET assay
Source: Royal Society of Chemistry journal article supplement (doi:10.1039/c3mb70155g), 2014-01-06

**Supplement Figure 1** Conjugation of CyPet-SUMO1 or SUMO1 to YPet-Aos1 in the presence of Uba2  $\pm$ ATP.

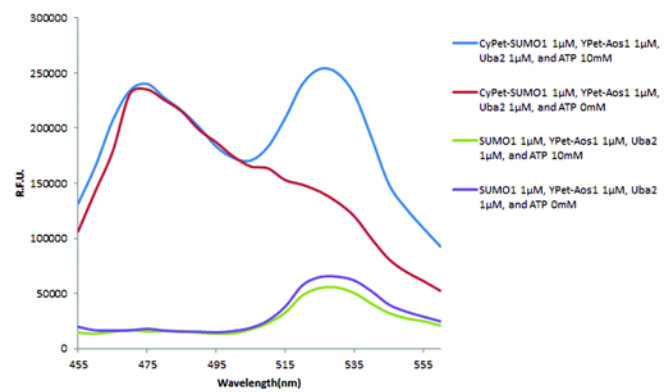

Supplement: c3mb70155g.pdf [file c3mb70155g.pdf]
